# Supplementary material
Source: Springer Nature journal article supplement (https://www.springermedizin.de/resource/supplementary/12937_2007_160_MOESM10_ESM.pdf/25654526)

%

Study ID

ES (95% CI)

Weight

Porrini et al. (1995)

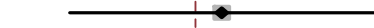

0.44 (0.14, 0.73)

11.78

Bingham et al. (1995)

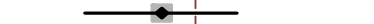

0.32 (0.17, 0.47)

19.47

Bingham et al. (1997)

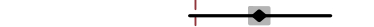

0.51 (0.37, 0.65)

20.15

Tsugane et al. (1998)

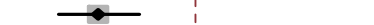

0.20 (0.12, 0.28)

23.15

Wright et al., Group 1 (1995)

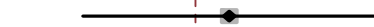

0.45 (0.17, 0.73)

12.37

Wright et al., Group 2 (1995)

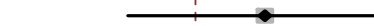

0.52 (0.26, 0.78)

13.08

Overall (I-squared = 75.1%, p = 0.001)

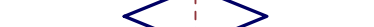

0.39 (0.25, 0.53)

100.00

NOTE: Weights are from random effects analysis

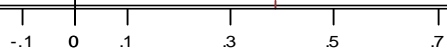

Supplement: MOESM10 [file 25654526]
